# Supplementary material for: JAK/Stat signaling regulates heart precursor diversification inDrosophila
Source: Oxford University Press journal article supplement (doi:10.1242/dev.071464), 2011-09-30
Supplement: dev071464tables1.pdf [file dev071464tables1.pdf]

Table S1. Analysis of Stat92E ChIP-chip hits

| Chromosome arm | Minimum bp | Maximum bp | Score  | *Associated gene(s)                          |
|----------------|------------|------------|--------|----------------------------------------------|
| chrX           | 2901424    | 2902236    | 73.14  | <i>Kirre</i>                                 |
| chrX           | 4305309    | 4306239    | 78.69  | <i>bifid</i>                                 |
| chrX           | 4510490    | 4511774    | 247.42 | <i>peb</i>                                   |
| chrX           | 5492329    | 5493147    | 57.14  | <i>Vsx-1</i>                                 |
| chrX           | 7187996    | 7188776    | 52.33  | <i>unc-119</i>                               |
| chrX           | 7212926    | 7213667    | 57.44  | <i>Atg-5</i>                                 |
| chrX           | 7785401    | 7786530    | 117.32 | <i>CG18624, Nek2</i>                         |
| chrX           | 8544368    | 8545492    | 72.83  | <i>oc</i>                                    |
| chrX           | 8574772    | 8575908    | 98.3   | <i>CG12772, CG11284</i>                      |
| chrX           | 11912286   | 11913620   | 151.36 | <i>CG15735, Tango4, Chrac-16, regucalcin</i> |
| chrX           | 13474786   | 13475449   | 54.66  | <i>Tango13</i>                               |
| chrX           | 18681811   | 18682777   | 93.37  | <i>Pk17E, CG6961</i>                         |
| chrX           | 19114551   | 19115369   | 68.04  | <i>CG7884, Muc18B</i>                        |
| chrX           | 19576637   | 19578171   | 202.17 | <i>dome</i>                                  |
| chrX           | 21210090   | 21210714   | 50     | <i>flil, tty</i>                             |
| chr2L          | 2972197    | 2973177    | 81.52  | <i>Rrp1, gTub23C</i>                         |
| chr2L          | 5239115    | 5239985    | 61.34  | <i>tkv</i>                                   |
| chr2L          | 5460973    | 5461815    | 57.68  | <i>mid</i>                                   |
| chr2L          | 6684090    | 6685093    | 90.2   | <i>Nhe3, CG11327</i>                         |
| chr2L          | 7056072    | 7056773    | 54.68  | <i>Mnn1, milt</i>                            |
| chr2L          | 8300304    | 8301304    | 57.39  | <i>Sarcoglycan a, CG7870</i>                 |
| chr2L          | 8302317    | 8303286    | 82.61  | <i>Sarcoglycan a, CG7870</i>                 |
| chr2L          | 8841120    | 8842596    | 97.8   | None predicted                               |
| chr2L          | 9448764    | 9449388    | 55.24  | <i>numb</i>                                  |
| chr2L          | 13165100   | 13165802   | 62.46  | <i>Sir-2, DnaJ-H</i>                         |
| chr2L          | 18143948   | 18145177   | 86.76  | <i>Socs36E</i>                               |
| chr2L          | 18149636   | 18150869   | 113.15 | <i>Socs36E</i>                               |
| chr2L          | 18151113   | 18152319   | 96.76  | <i>Socs36E</i>                               |
| chr2L          | 19571687   | 19572777   | 78.21  | <i>spitz</i>                                 |
| chr2L          | 19575764   | 19577326   | 143.96 | <i>spitz</i>                                 |
| chr2R          | 4801397    | 4802105    | 59.27  | <i>lin, Pgi</i>                              |
| chr2R          | 7084164    | 7085223    | 81.8   | <i>shn</i>                                   |
| chr2R          | 7085496    | 7087345    | 197.62 | <i>shn</i>                                   |
| chr2R          | 7415422    | 7416161    | 54.38  | <i>en</i>                                    |
| chr2R          | 9389481    | 9390497    | 90.54  | <i>drk, mars</i>                             |
| chr2R          | 9448745    | 9449489    | 52.86  | <i>CG13334, CG13335</i>                      |
| chr2R          | 9454395    | 9455951    | 81.58  | <i>CG13335</i>                               |
| chr2R          | 9455952    | 9456565    | 66.41  | <i>CG13335</i>                               |
| chr2R          | 9456907    | 9458882    | 116.91 | <i>CG13335</i>                               |
| chr2R          | 14689728   | 14690949   | 87.5   | <i>I(2)08717</i>                             |
| chr2R          | 14737858   | 14738557   | 53.35  | <i>CG15100, CG15084</i>                      |
| chr2R          | 15549267   | 15549972   | 57.74  | <i>mir-6 family, CG11018</i>                 |
| chr2R          | 16470820   | 16471875   | 80.15  | <i>mir-310 to mir-313</i>                    |
| chr2R          | 17137846   | 17138824   | 63.55  | <i>CG18375</i>                               |
| chr2R          | 17532909   | 17534085   | 77.43  | <i>CG10082</i>                               |
| chr2R          | 18576939   | 18578313   | 133.66 | <i>ppa, robo</i>                             |
| chr2R          | 20898906   | 20899774   | 55.43  | <i>zip, uzip</i>                             |
| chr3L          | 199589     | 200291     | 51.45  | <i>mri, rno</i>                              |
| chr3L          | 377687     | 378630     | 70.67  | <i>trachealess</i>                           |
| chr3L          | 612998     | 614603     | 106.06 | <i>Reg-2</i>                                 |
| chr3L          | 620809     | 621663     | 57.28  | None predicted                               |
| chr3L          | 621935     | 623182     | 123.15 | <i>Reg-2</i>                                 |
| chr3L          | 732741     | 733716     | 66     | <i>CG13897</i>                               |
| chr3L          | 1348356    | 1349718    | 108.69 | <i>Ptp61F</i>                                |
| chr3L          | 2588365    | 2589085    | 52.5   | <i>Ama</i>                                   |
| chr3L          | 2590543    | 2591289    | 54.41  | <i>dos</i>                                   |
| chr3L          | 3319083    | 3320303    | 90.14  | <i>CG12077, CG12016</i>                      |
| chr3L          | 4229611    | 4230633    | 58.93  | <i>ImpL2</i>                                 |
| chr3L          | 6757473    | 6758361    | 56.23  | <i>CG32392</i>                               |
| chr3L          | 6759861    | 6760926    | 77.07  | <i>CG32392</i>                               |
| chr3L          | 7428029    | 7429177    | 76.04  | <i>Rac2, CG14835</i>                         |
| chr3L          | 9065751    | 9066414    | 56.8   | <i>CG4911, CG4942</i>                        |
| chr3L          | 10068389   | 10069013   | 52.69  | None predicted                               |
| chr3L          | 12607406   | 12608069   | 53.28  | <i>caup</i>                                  |
| chr3L          | 15705142   | 15705924   | 67.32  | <i>CG42571</i>                               |
| chr3L          | 16036196   | 16037921   | 145.62 | <i>th</i>                                    |
| chr3L          | 16045410   | 16046109   | 54.64  | <i>mbs, th</i>                               |
| chr3L          | 16205919   | 16206543   | 50.51  | <i>CG13073</i>                               |
| chr3L          | 16483690   | 16484769   | 64.78  | <i>argos, CG33158</i>                        |
| chr3L          | 19026485   | 19027109   | 50.07  | <i>nkd</i>                                   |
| chr3L          | 19995465   | 19996089   | 52.13  | <i>Tom20, CG7668</i>                         |
| chr3R          | 851107     | 852115     | 68.09  | None predicted                               |
| chr3R          | 2586670    | 2587879    | 147.41 | <i>bcd, Ama</i>                              |

|       |          |          |        |                          |
|-------|----------|----------|--------|--------------------------|
| chr3R | 2826080  | 2826902  | 65.03  | <i>Antp</i>              |
| chr3R | 5873670  | 5874811  | 127.75 | CG12811, CG3925          |
| chr3R | 9724575  | 9725603  | 59.55  | <i>ems</i>               |
| chr3R | 9735133  | 9736074  | 59.29  | <i>ems</i>               |
| chr3R | 10818696 | 10819320 | 51.86  | None predicted           |
| chr3R | 11847285 | 11848107 | 55.09  | GATAe, CG17631           |
| chr3R | 13365487 | 13366458 | 69.38  | <i>SF1, l(3)07882</i>    |
| chr3R | 14982574 | 14983546 | 59.78  | <i>nos</i> , CG11779     |
| chr3R | 16375604 | 16376543 | 76.73  | <i>Stat92E</i>           |
| chr3R | 16399505 | 16400659 | 126.86 | CG5191, <i>TFAM</i>      |
| chr3R | 16460358 | 16461020 | 51.31  | <i>Pi3K92E, Hairless</i> |
| chr3R | 17466843 | 17468306 | 185.96 | <i>E2F</i>               |
| chr3R | 18970976 | 18971681 | 53     | <i>hh, unk</i>           |
| chr3R | 19947137 | 19947761 | 51.45  | <i>Ac76E, CG42263</i>    |
| chr3R | 21853261 | 21854011 | 54.76  | <i>m4, HLHm5</i>         |
| chr3R | 22692120 | 22693267 | 96.89  | <i>ball, His2Av</i>      |
| chr3R | 26426808 | 26428152 | 161.49 | CG2246, CG31019, CG31021 |

Data for this analysis was obtained from the modENCODE Stat92E chromatin immunopurification (ChIP)-chip study (Celniker et al., 2009).

\*Includes all ESTs within 10 kb of the reported region
